1 Development of a cloud framework for training and deployment of deep learning models in  
2 Radiology: automatic segmentation of the human spine from CT-scans as a case-study  
3 Rui Santos<sup>1\*</sup>, Nicholas Büniger<sup>1\*</sup>, Benedikt Herzog<sup>1,.,</sup> and Sebastiano Caprara<sup>1#</sup>

4  
5 <sup>1</sup>Digital Medicine Unit, Balgrist University Hospital Zürich, University of Zürich, Forchstrasse 340,  
6 8008, Zurich, CH, Switzerland.

7 \*Equally contributing authors

8 #Corresponding author: [sebastiano.caprara@balgrist.ch](mailto:sebastiano.caprara@balgrist.ch)

9

10

## 11 **Abstract**

12 Advancements in artificial intelligence (AI) and the digitalization of healthcare are revolutionizing  
13 clinical practices, with the deployment of AI models playing a crucial role in enhancing  
14 diagnostic accuracy and treatment outcomes. Our current study aims at bridging image data  
15 collected in a clinical setting, with deployment of deep learning algorithms for the segmentation  
16 of the human spine. The developed pipeline takes a decentralized approach, where selected  
17 clinical images are sent to a trusted research environment, part of private tenant in a cloud  
18 service provider. As a use-case scenario, we used the TotalSegmentator CT-scan dataset,  
19 along with its annotated ground-truth spine data, to train a ResSegNet model native to the  
20 MONAI-Label framework. Training and validation were conducted using high performance  
21 GPUs available on demand in the Trusted Research Environment. Segmentation model  
22 performance benchmarking involved metrics such as dice score, intersection over union,  
23 accuracy, precision, sensitivity, specificity, bounding F1 score, Cohen's kappa, area under the  
24 curve, and Hausdorff distance. To further assess model robustness, we also trained a state-of-  
25 the-art nnU-Net model using the same dataset and compared both models with a pre-trained  
26 spine segmentation model available within MONAI-Label. The ResSegNet model, deployable  
27 via MONAI-Label, demonstrated performance comparable to the state-of-the-art nnU-Net  
28 framework, with both models showing strong results across multiple segmentation metrics. This  
29 study successfully trained, evaluated and deployed a decentralized deep learning model for CT-  
30 scan spine segmentation in a cloud environment. This new model was validated against state-  
31 of-the-art alternatives. This comprehensive comparison highlights the value of the MONAI-Label  
32 as an effective tool for label generation, model training, and deployment, further highlighting its  
33 user-friendly nature and ease of deployment in clinical and research settings. Further we also  
34 demonstrate that such tools can be deployed in private and safe decentralized cloud  
35 environments for clinical use.

36

37 Key words: U-Net, ResSegNet, nnU-Net, deep-learning, framework, MONAI, cloud computing

38

39 Abbreviations:

40 DL: deep learning; AI: artificial intelligence; AUC: area under the curve

41

## 42 **Author Summary:**

43 In the rapidly evolving field of medical imaging, the integration of artificial intelligence (AI) and  
44 cloud computing is becoming increasingly critical for advancing diagnostic and treatment  
45 capabilities. To address the growing demand for flexible digital frameworks in the clinical  
46 environment supporting the deployment of data-driven applications, we have developed and  
47 deployed a cloud-based Trusted Research Environment designed specifically for training,  
48 validation, and deployment of deep learning models focused on semantic segmentation in  
49 musculoskeletal radiology. This environment facilitates the efficient handling of large datasets  
50 and the accessibility of algorithmic output for the physicians, optimizing the interface between  
51 development and clinical translation. The established framework enables significant  
52 improvements in the deployment of deep learning tools for image analysis in the clinical setting.  
53 In our current use-case, we have utilized this environment to train and evaluate two advanced  
54 deep learning models for the segmentation of the human spine from CT scans. By leveraging  
55 the computational power and flexibility of the cloud-based infrastructure, we were able to  
56 perform rigorous training and comparison of these models, aiming to enhance the accuracy and  
57 reliability of spine segmentation in clinical practice. This approach not only streamlines the  
58 process of model development but also provides valuable insights into the performance and  
59 potential clinical applications of these AI-driven segmentation tools.

60

## 61 **Introduction**

62 With the inflection point of Artificial Intelligence (AI) algorithms, with its deep learning (DL)  
63 models and frameworks (1), medical operations are facing the paradigm shift of both  
64 digitalization and DL models deployment. Out of all clinical specialties, Radiology is poised to be  
65 at the forefront of this transformation due to its inherent reliance on visual data and the well-  
66 established role of image analysis in diagnosis and treatment planning (2,3). As such, there is a  
67 strong research focus on developing and deploying AI models within the Radiology field. As an  
68 example, in the past 5 years (2019-2023), a total of 11'392 research manuscripts (PubMed  
69 search) were related in some form with the thematic of radiology and deep learning (DL).  
70 Indeed, medical imaging is a key area for the development of high added-value DL models that  
71 streamline and accelerate the process of image segmentation and classification, which is a  
72 major time-consuming task for physicians (4).  
73 Several AI tools have been developed with the objective of accelerating medical image  
74 segmentation. Recently, the development of the TotalSegmentator DL model (5), trained to  
75 segment 117 anatomical structures (version 2.0), from CT datasets, demonstrates the immense

76 possibilities that DL-powered medical image segmentation offers. For the development of such  
77 a powerful DL segmentation model, the nnU-Net framework was used (6). This framework  
78 allows the training of state-of-the art segmentations models, based on the U-Net DL architecture  
79 (7), with minimal to no coding needed. Still, these tools are limited in their deployment in daily  
80 clinical scenarios. As an easier and user-oriented approach, the open-source framework MONAI  
81 (Medical Open Network for Artificial Intelligence) (8) has been developed for the training and  
82 easier deployment of automatic medical image segmentation models. At the forefront of MONAI,  
83 the sub-framework MONAI-Label (9) connects DL architectures and pretrained models with  
84 open-source graphic user interfaces (GUI) such as 3D Slicer and OHIF (Open Health Imaging  
85 Foundation Viewer), enabling active learning with direct visualization and correction of  
86 segmentation results (10,11).

87 As optimal environment for the deployment of such aforementioned frameworks, the adoption of  
88 cloud computing in medical research setting, offers many benefits: it fosters improved  
89 collaboration among physicians and researchers, provides a decentralized and scalable  
90 computing infrastructure and greater accessibility to tools and services such as giving support for  
91 data annotation. Furthermore, cloud-based infrastructure offers simplified management of  
92 resources in a cost-effective manner, allowing medical research centers to focus resources on  
93 data analysis and clinical relevance of research questions rather than IT maintenance (12,13).

94 In this study, we have developed a cloud computing framework leveraging the open-source  
95 pipeline of MONAI-Label for the development and deployment for clinical research teams of an  
96 interactive spine segmentation model out of CT data. Moreover, we benchmarked the model  
97 output with an in-house trained nnU-Net model, both trained and validated with the same  
98 collection of images (TotalSegmentator open-source dataset). We also compare it with a  
99 pretrained model for spine segmentation present in MONAI-Label, trained on the VERSE  
100 dataset (14). We demonstrate that the MONAI-Label developed model produces similar  
101 segmentation results to the model trained with the nnU-Net framework yet providing a far  
102 simpler vertical integration in a clinical research setting. This *de novo* trained model also  
103 considerably outperforms the pretrained spine segmentation model present in MONAI-Label *ab*  
104 *initio*. Moreover, the presented research highlights the use of MONAI-Label as a powerful tool  
105 for developing DL models and automatically generating anatomical segmentation of anatomical  
106 structures which may support surgical planning, diagnostics and future creation of digital twins  
107 of patients (15,16).

108

## 109 **Materials and Methods**

110 *Architecture of a trusted cloud research environment for deep learning model training and*  
111 *deployment*

112 The framework introduced in this work is based on a private cloud environment composed of  
113 private endpoints, i.e., a pointer to the location of the data, which allows the hospital network to  
114 be extended in a private cloud space (figure 1A). Through an Application Programming Interface  
115 (API) Manager, the DICOM (Digital Imaging and Communications in Medicine standard) or NIFTI  
116 (Neuroimaging Informatics Technology Initiative) storage locations connect with cloud  
117 computational nodes (with adequate hardware accelerators, such as graphic processing units –  
118 GPUs), and a centralized management dashboard that allows the definition of strict governance  
119 policies, as the ones in place at healthcare institutions, granting secure and private access to  
120 specified users. Through the combination of the cloud services mentioned above, the framework  
121 composed of 3D Slicer and MONAI Label-based computational nodes was developed. In this way,  
122 scalable computation resources are connected with a Graphical User Interface (GUI) thanks to  
123 the open-source tool 3D Slicer, as shown on figure 1b.

124 For segmentation model training in the trusted research environment, the TotalSegmentator  
125 open-source image dataset was stored in a project-specific NIFTI storage and connected with  
126 computational resources embedded in the computational node via the API Manager.

127 For segmentation inference, an additional API allows the access to DICOM images stored in the  
128 clinical PACS (Picture Archiving and Communication System), retrieve these images to a DICOM  
129 storage location in the cloud which then directly connects to the MONAI Label computational node  
130 for automatic segmentation processing. The connection to the GUI results in a user-friendly  
131 environment where radiologists and other physicians can visualize the segmentation results,  
132 correct them, and potentially fine-tuning the models by sending the corrected results back to  
133 MONAI Label central instance to update the training.

134

135 *Resources for deep learning model training*

136 The TotalSegmentator dataset composed of CT images and their ground-truth vertebrae and  
137 sacrum segmentations (part of the open-source dataset) was used for model training in either the  
138 MONAI-Label or nnU-Net frameworks (5) (<https://zenodo.org/records/10047292>, with an average  
139 isotropic pixel size of 1.5 mm). The dataset was divided into training and inference dataset. 964  
140 images were randomly chosen to be part of the training dataset, while the remaining 108 were  
141 used for validation (the open-source version of the dataset contains more than 1200 images,  
142 nonetheless, some cannot be used with the current version, 2.0.1). The dataset was  
143 preprocessed in accordance with the requirements of both MONAI-Label and nnU-Net

144 (instructions found at [https://github.com/Project-MONAI/MONAILabel?tab=readme-ov-](https://github.com/Project-MONAI/MONAILabel?tab=readme-ov-file#getting-started-with-monai-label)  
145 [file#getting-started-with-monai-label](https://github.com/Project-MONAI/MONAILabel?tab=readme-ov-file#getting-started-with-monai-label) and <https://github.com/MIC-DKFZ/nnUNet>). The dataset  
146 was uploaded into a storage location in the developed cloud-based Trusted Research  
147 Environment. The default segmentation task in MONAI-Label , based on a ResSegNet  
148 architecture (17), was used for spine segmentation model training. The training was performed in  
149 4 A100 GPU computational nodes, for 1000 epochs, 241 iterations each, taking *circa* 25 hours of  
150 compute time. Since for both training and results analysis a graphic user interface is necessary,  
151 the open-source 3D Slicer tool was used in a container (<https://github.com/pieper/SlicerDockers>,  
152 v5.0.3). No validation split was used in this training as model benchmarking would be done with  
153 an already assigned dataset (remaining 108 images available). Default segmentation pipeline  
154 scripts were used with no modifications (segmentation.py, part of the radiology app from the  
155 MONAI-Label framework with a tutorial found here: [https://github.com/Project-](https://github.com/Project-MONAI/tutorials/tree/main/monailabel)  
156 [MONAI/tutorials/tree/main/monailabel](https://github.com/Project-MONAI/tutorials/tree/main/monailabel)). The nnU-Net model training was performed on one A100  
157 compute node for 1000 epochs, 250 iterations each, over the course of 15 hours of training. No  
158 validation split was used (fold 0), as model benchmarking would be done with an already assigned  
159 dataset (same 108 datasets used to validate the MONAI-Label model). Default nnU-Net pipeline  
160 scripts were used with no modifications, following the developers tutorial.

161

### 162 *Deep learning model benchmarking*

163 108 CT scans of the TotalSegmentator dataset (not part of the dataset for DL model training)  
164 were used for model validation. We calculated different segmentation metrics to benchmark both  
165 deep learning models' segmentation results such as dice score, intersection over union, accuracy,  
166 precision, sensitivity, specificity, bounding F1 score, recall, area under the curve (AUC) and the  
167 Hausdorff distance between segmentation predictions and their ground truth (18). Each metric  
168 was calculated with custom scripts (available upon request). Calculation of distances between  
169 ground truth and predicted segmentations was done in the open-source software Meshlab  
170 (<https://www.meshlab.net/>) v2022.02 with built-in functions. P-values were calculated based on a  
171 non-paired t-student function.

172

## 173 **Results**

### 174 *Benefits of a decentralized cloud infrastructure for DL model training and deployment*

175 Deploying a decentralized trusted research environment on the cloud for training and deployment  
176 of deep learning models present two major benefits: on one hand the scalability and flexibility to

177 compose a tailored DL model for a specific research or clinical question, on the other hand, the  
178 possibility to deploy the developed models in clinical workflows using the same architecture.  
179 Depending on the size and architecture of the model, the compute resources of the computational  
180 nodes can be quickly scaled-up or scaled-down, providing the creation of an optimized setup for  
181 each use-case requiring a training, validation and/or deployment of a research or clinical DL  
182 model. Further, this decentralized approach makes it far simpler to securely and privately connect  
183 different medical devices (CT scanners, MRI machines, ultrasound machines, etc.) as endpoints  
184 to the developed trusted research environment and get outputs in real-time.  
185 Within the MONAI Label framework, multiple models can easily be retrieved and fine-tuned by  
186 labeling additional data via a user-friendly GUI, in this way a local version can be trained. The  
187 versatility of this process enables various healthcare operators, e.g. radiologists, to retrain models  
188 on top of open-source available models (transfer learning). Furthermore, they can easily test  
189 models that have been previously created in the framework and validate them thanks to  
190 commonly available software for 3D visualization. This way, the interaction between model's  
191 development and radiologists is considerably improved and physicians are a central component  
192 in the development of new ML models.

193  
194 *Training a ResSegNet based CT-scan spine segmentation model within the MONAI-Label*  
195 *framework: spineCT-ResSegNet model*

196 Out of 1072 images present in the TotalSegmentator, 964 images (90% of the dataset), were  
197 randomly chosen to compose the training dataset, while 108 (remaining dataset) served as the  
198 validation dataset. Default 3D ResSegNet parameters of the segmentation (ResSegNet) task of  
199 MONAI-Label radiology app, were used. Qualitative analysis of the segmentation results (figure  
200 2A) demonstrates the capacity of robust prediction of the entire human spine and sacrum (25  
201 segmented classes). Vertebral bodies identification is correctly done, with their shape being in  
202 accordance with anatomical expectancy. Quantitative segmentation quality metrics over all the  
203 25 classes reveal a robust model for spine segmentation from CT-scans with an average dice  
204 score of  $0.856 \pm 0.066$ , an average intersection over union score of  $0.801 \pm 0.074$ , average  
205 accuracy of  $1.000 \pm 0.000$ , a mean precision of  $0.862 \pm 0.066$ , a mean sensitivity (or recall) of  
206  $0.861 \pm 0.070$ , a mean specificity of  $1.000 \pm 0.000$ , an average bounding F1 score of  $0.837 \pm 0.057$ ,  
207 a mean area under the curve (AUC) of  $0.932 \pm 0.034$  and a Kappa of  $0.853 \pm 0.068$  (figure 2B, all  
208 numbers rounded to 3 decimal places). Detailed results, with 95% confidence intervals, are found  
209 in supplementary figure 1.

210

211 *Training a nnU-Net based CT-scan spine segmentation model: spineCT-nnUNet model*

212 Serving as a benchmark for DL segmentation model comparison, we trained the nnU-Net  
213 framework on the same dataset [OBJ:OBJ], with the 3D-UNet full resolution model (1.5 mm), using the  
214 default configuration and trained the model over 1000 epochs. Validation was performed with the  
215 same 108 CT scans as for the MONAI-Label ResSegNet model, native to MONAI-Label.  
216 Segmentation output is qualitatively robust with anatomical structures, i.e. vertebrae, are localized  
217 to their correct position and have a correct tridimensional conformational (figure 3A). [OBJ:OBJ] between  
218 the segmentation prediction and their ground-truth, reveal a robust prediction model, with an  
219 average dice score over the 25 classes (anatomical structures) of  $0.914\pm 0.036$ , an average  
220 intersection over union of  $0.879\pm 0.045$ , an accuracy of  $1.000\pm 0.000$ , a precision of  $0.911\pm 0.046$ ,  
221 a sensitivity (or recall) of  $0.910\pm 0.050$ , a specificity of  $1.000\pm 0.000$ , a boundary F1 score of  
222  $0.908\pm 0.029$ , an AUC score of  $0.961\pm 0.018$  and a Kappa score of  $0.904\pm 0.049$  (figure 3B, 5 all  
223 numbers rounded to 3 decimal places). Detailed results, with 95% confidence intervals, are found  
224 in supplementary figure 2.

225

226 *Comparison of spineCT-ResSegNet, spineCT-nnUNet and pretrained spine segmentation*  
227 *models*

228 To further compare the segmentation predictions between the ResSegNet model and the nnU-  
229 Net model to the respective ground truth, we overlaid selected examples as exemplified in figure  
230 4A (spineCT-ResSegNet) and 4C (spineCT-nnUNet). Hausdorff distances between each  
231 segmentation model predictions and their ground truths were calculated (spineCT-ResSegNet  
232 and spineCT-nnUNet in figure 4B and figure 4D respectively). The spineCT-ResSegNet model  
233 presents an average Hausdorff distance of  $2.604\pm 0.450$  mm while the spineCT-nnUNet model  
234 predictions present a Hausdorff distance of  $2.214\pm 0.398$ . While the nnU-Net based model  
235 outperforms the ResSegNet model in regard to the quality metric of Hausdorff distance, the same  
236 is not observed for the remaining metrics calculated. Thus, we find sufficient evidence to say both  
237 models produce on-par segmentation results (supplementary figure 5A, all p-valued rounded to 5  
238 decimal plates).

239 We also benchmarked the pretrained vertebrae segmentation model which is part of the MONAI-  
240 Label core. The model spine segmentation predictions average a dice score over the 24 classes  
241 (as this model only predicts from C1 to L5) of  $0.601\pm 0.153$ , an average intersection over union of  
242  $0.533\pm 0.154$ , an accuracy of  $1.000\pm 0.000$ , a precision of  $0.697\pm 0.150$ , a sensitivity (or recall) of  
243  $0.565\pm 0.157$ , a specificity of  $1.000\pm 0.000$ , a boundary F1 score of  $0.588\pm 0.144$ , an AUC score  
244 of  $0.785\pm 0.080$  and a Kappa score of  $0.597\pm 0.151$  (supplementary figure 3, all numbers rounded

245 to 3 decimal places). The output segmentations present a Hausdorff distance of  $3.129 \pm 0.322$  mm  
246 on average. Thus, we can demonstrate that the *de novo* trained model spineCT-ResSegNet  
247 outperforms the pretrained model in MONAI-Label in most quality metrics calculated  
248 (supplementary figure 5B, all p-values rounded to 5 decimal plates). Furthermore, it also trained  
249 in one more class, the sacrum.

250

## 251 **Discussion**

252 A decentralized trusted research environment as a core of novel digital ecosystems in medical  
253 research has the potential to simplify communication between physicians and researchers, enable  
254 effective testing and validation of novel tools, provide secure and private data exchange channels  
255 - and ultimately reduce costs by sharing computational resources, with non-complicated  
256 scalability. Further benefits are the ability to access common datasets, shared code, and  
257 validation methods at any time reduces errors and improves usability - and thus accelerates the  
258 clinical translation of digital technologies. Altogether, such platforms facilitate testing and  
259 validation of digital and DL pipelines, making data-driven medical research more reproducible and  
260 better suited for the deployment in clinical settings. With these principles in mind, we developed  
261 a radiology-specific cloud infrastructure, based on a combination of DICOM storage services and  
262 MONAI-Label-compatible computational nodes for the training and deployment of deep learning  
263 segmentation models.

264 As a case-study, we trained and deployed a ResSegNet model for human spine segmentation  
265 out the open-source dataset of CT-scans from TotalSegmentator. This model was trained as part  
266 of the MONAI-Label (8,19) framework. As a benchmark, we used the nnU-Net framework (6) and  
267 also trained a segmentation model with the same training and inference dataset. Both models  
268 yielded similar quality metric results with only average Hausdorff distance being noticeable better  
269 for the nnU-Net model, than for the ResSegNet model (figure 4 and supplementary figure 5).  
270 Nonetheless, given the native deployment of the ResSegNet model via MONAI-Label, we can  
271 directly deploy it via a graphic user interface such as 3D Slicer or OHIF (10,11), which is not  
272 possible with the nnU-Net, at least not in a straightforward way. This in-place visualization  
273 provides direct access to the segmentation results to the health professionals who can use it to  
274 make informed decisions, e.g. for surgical planning.

275 We also compared our trained model, spineCT-ResSegNet, with the pre-trained and pre-built  
276 spine segmentation model which MONAI-Label already offers (14). Our newly trained model  
277 greatly outperforms the prebuilt model in all metrics, providing substantially more accurate  
278 segmentations (supplemental figure 4 and 5).



279 While our developed models underperformed compared with the dice scores reported for the  
280 TotalSegmentator model (average 0.95 for vertebrae) (5), this nnU-Net based model was trained  
281 for 8000 epochs compared to ours which was trained for only 1000 epochs. This meant a far lower  
282 training time for our model, fewer computational resources were needed, while still performing  
283 adequately for the task at hand.

284 Naturally, given the dice coefficient of around 0.85 and a hausdorff coefficient of approximately  
285 2.6 mm, the ResSegNet model incurs in mispredictions and proper segmentation correction may  
286 be necessary. Nonetheless, the iterative nature and easy of use of MONAI-Label and a chosen  
287 GUI such as 3d Slicer, makes any necessary corrections easy to perform. Further, this corrections  
288 may be included as part of a subsequent finetuned model, as part of the labelling correction  
289 process, which will then, increase the predictive power of the model.

290

## 291 **Conclusion**

292 The present research demonstrates the potential of cloud-based deep learning for training and  
293 deployment of medical image segmentation models, in a trusted research environment. By  
294 leveraging the efficiency and scalability of cloud computing, we have created a framework that  
295 empowers medical professionals, such as radiologists, with faster, more accessible segmentation  
296 tools, based on the MONAI-Label open-source framework. This paves the way for improved  
297 diagnostics, treatment planning, and ultimately, better patient outcomes.

298

## 299 **Author Contribution**

300 NB developed and deployed the trusted cloud environment. RS worked on the development and  
301 testing of the deep learning segmentation models. BH assisted NB in the infrastructure setting of  
302 the trusted cloud environment. NB, RS and SC wrote the manuscript and designed the figures.  
303 SC supervised the design of the infrastructure and pipeline and contributed to the design of the  
304 research and interpretation of the results. MF contributed to the final version of the manuscript.

305

## 306 **Acknowledgements**

307 The authors acknowledge the Digital Society Initiative, University of Zurich. This work is part of  
308 the DSI-Infrastructure / Lab-Program.

309

## 310 **References**

- 311 1. Sevilla J, Heim L, Ho A, Besiroglu T, Hobbhahn M, Villalobos P. Compute Trends Across Three Eras  
312 of Machine Learning. Proceedings of the International Joint Conference on Neural Networks.  
313 Institute of Electrical and Electronics Engineers Inc.; 2022. doi:  
314 10.1109/IJCNN55064.2022.9891914.
- 315 2. Saba L, Biswas M, Kuppili V, et al. The present and future of deep learning in radiology. Eur J  
316 Radiol. Elsevier Ireland Ltd; 2019. p. 14–24. doi: 10.1016/j.ejrad.2019.02.038.

- 317 3. Chea P, Mandell JC. Current applications and future directions of deep learning in  
318 musculoskeletal radiology. *Skeletal Radiol.* Springer; 2020. p. 183–197. doi: 10.1007/s00256-019-  
319 03284-z.
- 320 4. Langlotz CP. The Future of AI and Informatics in Radiology: 10 Predictions. *Radiology.* Radiological  
321 Society of North America Inc.; 2023. doi: 10.1148/radiol.231114.
- 322 5. Wasserthal J, Breit HC, Meyer MT, et al. TotalSegmentator: Robust Segmentation of 104  
323 Anatomic Structures in CT Images. *Radiol Artif Intell.* Radiological Society of North America Inc.;  
324 2023;5(5). doi: 10.1148/RYAI.230024/ASSET/IMAGES/LARGE/RYAI.230024.VA.JPEG.
- 325 6. Isensee F, Jaeger PF, Kohl SAA, Petersen J, Maier-Hein KH. nnU-Net: a self-configuring method for  
326 deep learning-based biomedical image segmentation. *Nature Methods* 2020 18:2. Nature  
327 Publishing Group; 2020;18(2):203–211. doi: 10.1038/s41592-020-01008-z.
- 328 7. Ronneberger O, Fischer P, Brox T. U-net: Convolutional networks for biomedical image  
329 segmentation. *Lecture Notes in Computer Science (including subseries Lecture Notes in Artificial  
330 Intelligence and Lecture Notes in Bioinformatics).* Springer Verlag; 2015. p. 234–241. doi:  
331 10.1007/978-3-319-24574-4\_28.
- 332 8. Jorge Cardoso M, Li W, Brown R, et al. MONAI: An open-source framework for deep learning in  
333 healthcare. 2022;
- 334 9. Diaz-Pinto A, Alle S, Nath V, et al. MONAI Label: A framework for AI-assisted Interactive Labeling  
335 of 3D Medical Images. 2022; doi: 10.1016/j.media.2024.103207.
- 336 10. Fedorov A, Beichel R, Kalpathy-Cramer J, et al. 3D Slicer as an image computing platform for the  
337 Quantitative Imaging Network. *Magn Reson Imaging.* 2012;30(9):1323–1341. doi:  
338 10.1016/j.mri.2012.05.001.
- 339 11. Ziegler E, Urban T, Brown D, et al. Open Health Imaging Foundation Viewer: An Extensible Open-  
340 Source Framework for Building Web-Based Imaging Applications to Support Cancer Research. *JCO  
341 Clin Cancer Inform.* 2020. <https://doi.org/10.1016/j.media.2024.103207>.
- 342 12. Griebel L, Prokosch HU, Köpcke F, et al. A scoping review of cloud computing in healthcare. *BMC  
343 Med Inform Decis Mak.* BioMed Central Ltd; 2015. doi: 10.1186/s12911-015-0145-7.
- 344 13. Navale V, Bourne PE. Cloud computing applications for biomedical science: A perspective. *PLoS  
345 Comput Biol.* Public Library of Science; 2018;14(6). doi: 10.1371/journal.pcbi.1006144.
- 346 14. Sekuboyina A, Hussein ME, Bayat A, et al. VERSE: A Vertebrae labelling and segmentation  
347 benchmark for multi-detector CT images. *Med Image Anal.* Elsevier B.V.; 2021. doi:  
348 10.1016/j.media.2021.102166.
- 349 15. Caprara S, Carrillo F, Snedeker JG, Farshad M, Senteler M. Automated Pipeline to Generate  
350 Anatomically Accurate Patient-Specific Biomechanical Models of Healthy and Pathological FSUs.  
351 *Front Bioeng Biotechnol.* Frontiers Media S.A.; 2021;9. doi: 10.3389/fbioe.2021.636953.

- 352 16. Iqbal JD, Krauthammer M, Biller-Andorno N. The Use and Ethics of Digital Twins in Medicine.  
353 Journal of Law, Medicine and Ethics. Cambridge University Press; 2022;50(3):583–596. doi:  
354 10.1017/jme.2022.97.
- 355 17. Saxena N, Babu NK, Raman B. Semantic segmentation of multispectral images using res-seg-net  
356 model. Proceedings - 14th IEEE International Conference on Semantic Computing, ICSC 2020.  
357 Institute of Electrical and Electronics Engineers Inc.; 2020. p. 154–157. doi:  
358 10.1109/ICSC.2020.00030.
- 359 18. Müller D, Soto-Rey I, Kramer F. Towards a guideline for evaluation metrics in medical image  
360 segmentation. BMC Res Notes. BioMed Central Ltd; 2022. doi: 10.1186/s13104-022-06096-y.
- 361 19. Diaz-Pinto A, Alle S, Nath V, et al. MONAI Label: A framework for AI-assisted Interactive Labeling  
362 of 3D Medical Images. 2022; <http://arxiv.org/abs/2203.12362>.
- 363
- 364

## 365 **Figure Legends**

366

### 367 **Figure 1: Architecture of the cloud infrastructure behind the trusted research environment**

368 **and deployed framework with 3D Slicer and MONAI-Label. (A)** Overview of the components  
369 of the architecture of the trusted research environment: storage and compute. The first one has  
370 a DICOM blob storage which is exposed with a private endpoint; while the second one has more  
371 components. The compute workspace is exposed as well with a private endpoint, while the other  
372 component such as storage account, key vault Jupyter notebook and container registry are  
373 connected to the workspace. Both systems have group permissions that can be managed  
374 individually. To access the trusted research environment, users can use a Virtual Desktop  
375 application **(B)** Using two compute nodes, 3D Slicer and MONAI Label are deployed separately.  
376 With an SSH connection users can access an online environment to use the 3D Slicer interface  
377 to interact with the model's output that runs on the first compute node (from the left side), which  
378 process the DICOM images retrieved by the second compute node on which MONAI Label is  
379 running from the DICOM blob storage.

380

### 381 **Figure 2 – SpineCT-ResSegNet spine segmentation model predictions and segmentation**

382 **metrics. (A)** Example of segmentation results with the spineCT-ResSegNet, a trained MONAI-  
383 Label native model, in both 2D and 3D visualizations. Vertebrae are color coded. The entire  
384 human spine is represented in the image: cervical spine (C1-C7), thoracic spine (T1-T12),  
385 Lumbar spine (L1-L5) and sacrum. **(B)** Validation metrics for spineCT-ResSegNet spine  
386 segmentation model, based on the prediction of 108 cases. Color encodes the accuracy of  
387 segmentation class predictions. Blue indicates high similarity to the ground truth, while red  
388 represents increasing deviation from the actual values.

389

### 390 **Figure 3 – SpineCT-nnUNet spine segmentation model predictions and segmentation**

391 **metrics. (A)** Example of segmentation results with the nnU-Net framework derived model (3D-  
392 full resolution) in both 2D and 3D visualizations. Vertebrae are color coded. The entire human  
393 spine is represented in the image: cervical spine (C1-C7), thoracic spine (T1-T12), Lumbar  
394 spine (L1-L5) and sacrum. **(B)** Validation metrics for spineCT-nnUNet spine segmentation  
395 model. Color encodes the accuracy of segmentation class predictions. Blue indicates high  
396 similarity to the ground truth, while red represents increasing deviation from the actual values.

397

398 **Figure 4 – Comparison of spineCT-ResSegNet and spineCT-nnUNet semantic**  
399 **segmentation models.** (A) Example of the Hausdorff distance calculation between the spineCT-  
400 ResSegNet model (native to MONAI-Label) predictions and ground truth. (B) Average Hausdorff  
401 distance calculation for spineCT-ResSegNet predictions versus their ground truth. Predictions  
402 with the spineCT-ResSegNet model average a Hausdorff Distance of  $2.604 \pm 0.450$  mm to the  
403 ground truth. (C) Example of the Hausdorff distance calculation between the spineCT-nnUNet  
404 model predictions and ground truth. (D) Average Hausdorff distance calculation for spineCT-  
405 nnUNet predictions versus their ground truth. Predictions with the spineCT-nnUNet model  
406 average a Hausdorff Distance of  $2.214 \pm 0.398$  mm to the ground truth. Color encoding in (B) and  
407 (D) correlates with the accuracy of segmentation class predictions. Blue indicates high similarity  
408 to the ground truth, while red represents increasing deviation from the actual values.

409  
410 **Supplemental Figure 1 – Comprehensive metrics evaluation of the spineCT-ResSegNet.**  
411 Average metrics for the spineCT-ResSegNet model based on comparison between the  
412 predictions of the model on 108 datasets and their ground truth.

413  
414 **Supplemental Figure 2 – Comprehensive metrics evaluation of the spineCT-nnUNet.**  
415 Average metrics for the spineCT-ResSegNet model based on comparison between the  
416 predictions of the model on 108 datasets and their ground truth.

417  
418 **Supplemental Figure 3 – Comprehensive metrics evaluation of the open-source vertebrae**  
419 **segmentation model of MONAI-Label.** Average metrics for the spineCT-ResSegNet model  
420 based on comparison between the predictions of the model on 108 datasets and their ground  
421 truth.

422  
423 **Supplementary Figure 4 – Hausdorff distance between prediction and ground truth by the**  
424 **open-source vertebrae segmentation model of MONAI-Label.** (A) Example of the Hausdorff  
425 distance calculation between the spineCT-ResSegNet model (native to MONAI-Label) predictions  
426 and ground truth. (B) The pre-trained model present in MONAI-Label, trained on the VERSE  
427 dataset averages a Hausdorff Distance of  $3.129 \pm 0.322$  mm between model segmentation  
428 prediction and ground truth.

429  
430 **Supplementary Figure 5 – Statistical significance analysis between the quality**  
431 **segmentation metrics for each method used.** (A) On average, both models, spineCT-

432 ResSegNet and spineCT-nnUNet outputs are similar with the later one outperforming the MONAI-  
433 Label native model, only in regard to Hausdorff distance. Thus, both models appear to have a  
434 relatively equal prediction quality. (B) The newly trained spineCT-ResSegNet model mostly  
435 outperforms the pre-built spine segmentation model present in the MONAI-Label framework.  
436 Further, the model was trained in one extra class, the sacrum, capable of performing robust  
437 predictions for the anatomical class.

Figure 1

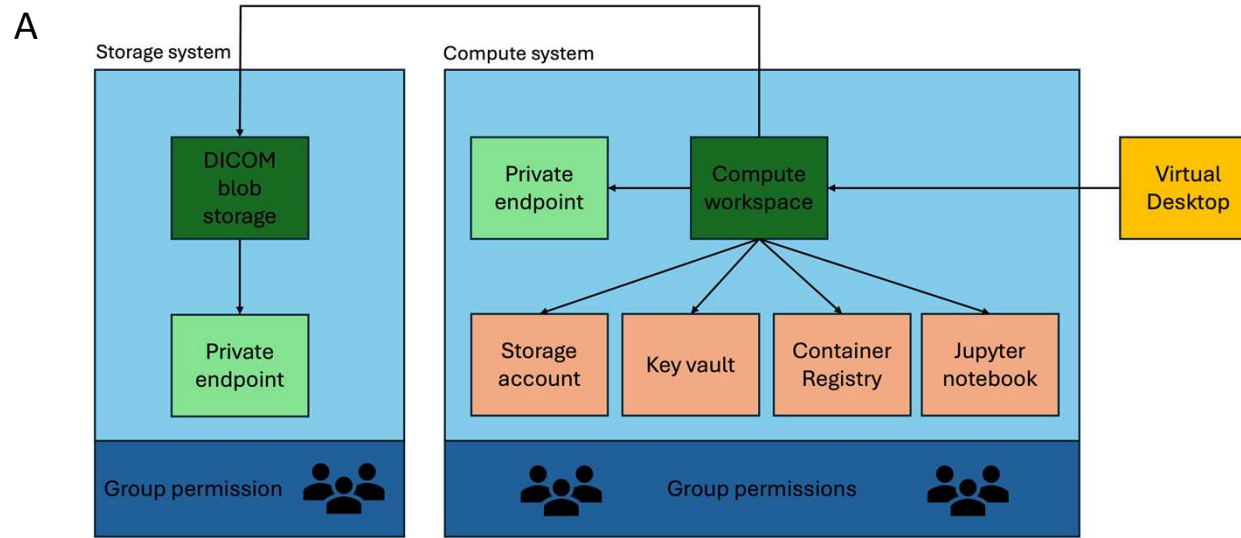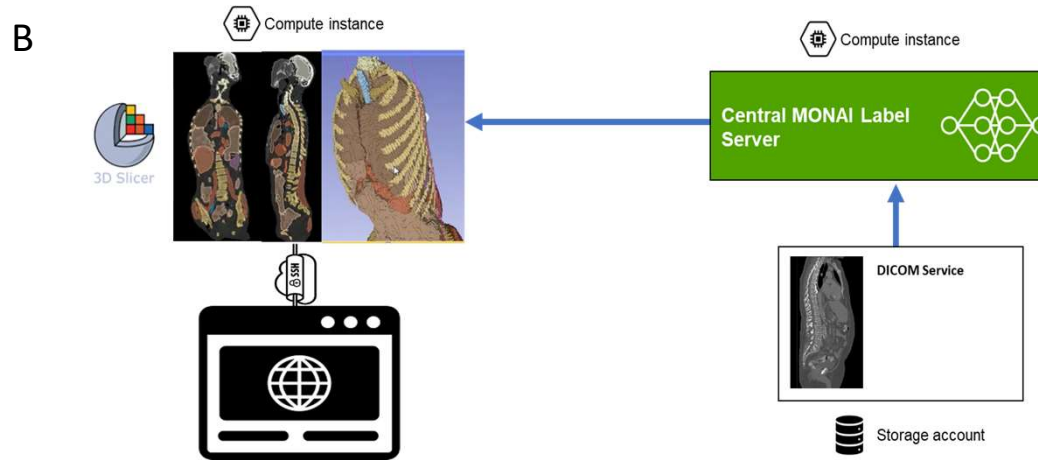

Figure 2

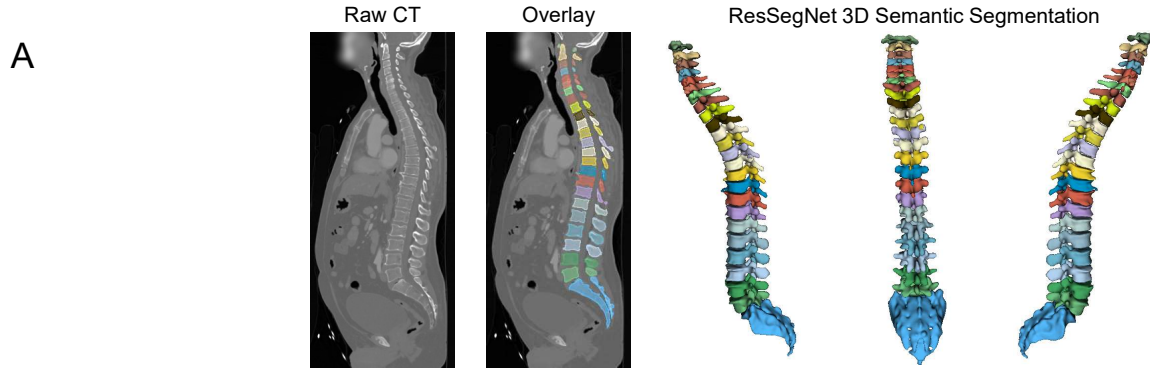

B

| Metric  | DICE Score |       | IoU     |       | Accuracy |       | Precision |       | Sensitivity |       | Specificity |       | Boundary F1 Score |       | AUC     |       | Kappa   |       |
|---------|------------|-------|---------|-------|----------|-------|-----------|-------|-------------|-------|-------------|-------|-------------------|-------|---------|-------|---------|-------|
|         | Average    | SD    | Average | SD    | Average  | SD    | Average   | SD    | Average     | SD    | Average     | SD    | Average           | SD    | Average | SD    | Average | SD    |
| C1      | 0.807      | 0.330 | 0.758   | 0.314 | 1.000    | 0.000 | 0.796     | 0.327 | 0.820       | 0.336 | 1.000       | 0.000 | 0.792             | 0.325 | 0.910   | 0.168 | 0.806   | 0.330 |
| C2      | 0.891      | 0.219 | 0.846   | 0.226 | 1.000    | 0.000 | 0.877     | 0.233 | 0.915       | 0.212 | 1.000       | 0.000 | 0.880             | 0.212 | 0.957   | 0.106 | 0.891   | 0.219 |
| C3      | 0.891      | 0.211 | 0.840   | 0.207 | 1.000    | 0.000 | 0.907     | 0.204 | 0.877       | 0.213 | 1.000       | 0.000 | 0.894             | 0.134 | 0.939   | 0.107 | 0.890   | 0.211 |
| C4      | 0.896      | 0.110 | 0.826   | 0.155 | 1.000    | 0.000 | 0.895     | 0.145 | 0.911       | 0.090 | 1.000       | 0.000 | 0.890             | 0.107 | 0.955   | 0.045 | 0.896   | 0.110 |
| C5      | 0.647      | 0.405 | 0.589   | 0.382 | 1.000    | 0.000 | 0.668     | 0.423 | 0.655       | 0.397 | 1.000       | 0.000 | 0.654             | 0.399 | 0.827   | 0.198 | 0.647   | 0.405 |
| C6      | 0.737      | 0.311 | 0.656   | 0.306 | 1.000    | 0.000 | 0.762     | 0.324 | 0.725       | 0.343 | 1.000       | 0.000 | 0.734             | 0.296 | 0.872   | 0.165 | 0.723   | 0.324 |
| C7      | 0.812      | 0.222 | 0.724   | 0.225 | 1.000    | 0.000 | 0.874     | 0.204 | 0.792       | 0.219 | 1.000       | 0.000 | 0.783             | 0.196 | 0.896   | 0.110 | 0.812   | 0.222 |
| T1      | 0.883      | 0.159 | 0.814   | 0.172 | 1.000    | 0.000 | 0.839     | 0.166 | 0.945       | 0.146 | 1.000       | 0.000 | 0.846             | 0.134 | 0.973   | 0.073 | 0.883   | 0.159 |
| T2      | 0.892      | 0.215 | 0.846   | 0.221 | 1.000    | 0.001 | 0.905     | 0.212 | 0.882       | 0.218 | 1.000       | 0.000 | 0.883             | 0.183 | 0.941   | 0.109 | 0.892   | 0.215 |
| T3      | 0.811      | 0.277 | 0.748   | 0.289 | 1.000    | 0.000 | 0.840     | 0.268 | 0.783       | 0.309 | 1.000       | 0.000 | 0.815             | 0.237 | 0.899   | 0.147 | 0.799   | 0.292 |
| T4      | 0.804      | 0.282 | 0.739   | 0.295 | 1.000    | 0.001 | 0.775     | 0.289 | 0.850       | 0.268 | 1.000       | 0.000 | 0.787             | 0.251 | 0.925   | 0.134 | 0.803   | 0.282 |
| T5      | 0.830      | 0.267 | 0.771   | 0.279 | 1.000    | 0.001 | 0.838     | 0.267 | 0.826       | 0.270 | 1.000       | 0.001 | 0.823             | 0.230 | 0.913   | 0.135 | 0.830   | 0.267 |
| T6      | 0.782      | 0.311 | 0.722   | 0.319 | 1.000    | 0.001 | 0.783     | 0.310 | 0.786       | 0.313 | 1.000       | 0.000 | 0.780             | 0.269 | 0.893   | 0.157 | 0.782   | 0.312 |
| T7      | 0.816      | 0.259 | 0.748   | 0.280 | 1.000    | 0.001 | 0.798     | 0.293 | 0.813       | 0.298 | 1.000       | 0.000 | 0.805             | 0.224 | 0.920   | 0.133 | 0.793   | 0.289 |
| T8      | 0.879      | 0.195 | 0.819   | 0.214 | 1.000    | 0.001 | 0.858     | 0.234 | 0.888       | 0.207 | 1.000       | 0.000 | 0.850             | 0.173 | 0.951   | 0.089 | 0.866   | 0.219 |
| T9      | 0.878      | 0.229 | 0.830   | 0.241 | 1.000    | 0.001 | 0.883     | 0.237 | 0.877       | 0.221 | 1.000       | 0.001 | 0.853             | 0.202 | 0.938   | 0.111 | 0.878   | 0.229 |
| T10     | 0.894      | 0.223 | 0.855   | 0.237 | 1.000    | 0.001 | 0.911     | 0.217 | 0.882       | 0.231 | 1.000       | 0.001 | 0.877             | 0.195 | 0.941   | 0.116 | 0.894   | 0.223 |
| T11     | 0.917      | 0.171 | 0.877   | 0.194 | 1.000    | 0.001 | 0.915     | 0.169 | 0.923       | 0.175 | 1.000       | 0.000 | 0.895             | 0.147 | 0.961   | 0.088 | 0.917   | 0.172 |
| T12     | 0.915      | 0.166 | 0.872   | 0.190 | 1.000    | 0.001 | 0.909     | 0.195 | 0.909       | 0.194 | 1.000       | 0.000 | 0.885             | 0.152 | 0.961   | 0.081 | 0.903   | 0.195 |
| L1      | 0.900      | 0.198 | 0.856   | 0.220 | 1.000    | 0.001 | 0.917     | 0.197 | 0.906       | 0.175 | 1.000       | 0.000 | 0.870             | 0.191 | 0.953   | 0.087 | 0.900   | 0.198 |
| L2      | 0.870      | 0.211 | 0.815   | 0.247 | 1.000    | 0.001 | 0.920     | 0.189 | 0.864       | 0.189 | 1.000       | 0.000 | 0.851             | 0.181 | 0.932   | 0.095 | 0.870   | 0.211 |
| L3      | 0.904      | 0.162 | 0.853   | 0.197 | 1.000    | 0.002 | 0.912     | 0.172 | 0.912       | 0.154 | 1.000       | 0.001 | 0.869             | 0.150 | 0.956   | 0.077 | 0.904   | 0.163 |
| L4      | 0.883      | 0.211 | 0.833   | 0.230 | 1.000    | 0.001 | 0.908     | 0.218 | 0.889       | 0.177 | 1.000       | 0.001 | 0.846             | 0.188 | 0.944   | 0.088 | 0.883   | 0.211 |
| L5      | 0.914      | 0.134 | 0.859   | 0.154 | 1.000    | 0.001 | 0.906     | 0.103 | 0.936       | 0.137 | 1.000       | 0.000 | 0.867             | 0.130 | 0.968   | 0.068 | 0.914   | 0.134 |
| Sacrum  | 0.956      | 0.033 | 0.917   | 0.055 | 1.000    | 0.000 | 0.965     | 0.044 | 0.949       | 0.039 | 1.000       | 0.000 | 0.905             | 0.044 | 0.975   | 0.020 | 0.956   | 0.033 |
| Average | 0.856      |       | 0.801   |       | 1.000    |       | 0.862     |       | 0.861       |       | 1.000       |       | 0.837             |       | 0.932   |       | 0.853   |       |
| SD      | 0.066      |       | 0.074   |       | 0.000    |       | 0.066     |       | 0.070       |       | 0.000       |       | 0.057             |       | 0.034   |       | 0.068   |       |



Figure 3

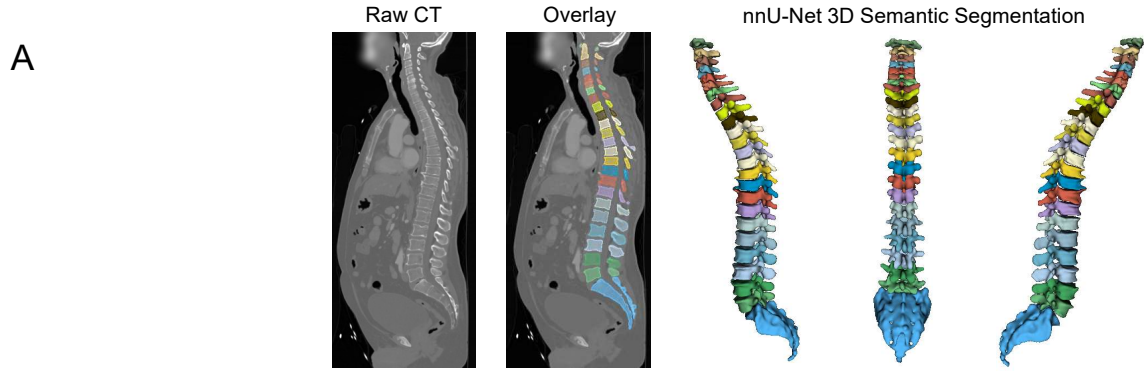

B

| Metric  | DICE Score |       | IoU     |       | Accuracy |       | Precision |       | Sensitivity (recall) |       | Specificity |       | Boundary F1 Score |       | AUC     |       | Kappa   |       |
|---------|------------|-------|---------|-------|----------|-------|-----------|-------|----------------------|-------|-------------|-------|-------------------|-------|---------|-------|---------|-------|
|         | Average    | SD    | Average | SD    | Average  | SD    | Average   | SD    | Average              | SD    | Average     | SD    | Average           | SD    | Average | SD    | Average | SD    |
| C1      | 0.843      | 0.303 | 0.805   | 0.308 | 1.000    | 0.000 | 0.847     | 0.337 | 0.790                | 0.353 | 1.000       | 0.000 | 0.838             | 0.296 | 0.917   | 0.155 | 0.806   | 0.345 |
| C2      | 0.911      | 0.220 | 0.880   | 0.227 | 1.000    | 0.000 | 0.901     | 0.230 | 0.928                | 0.213 | 1.000       | 0.000 | 0.908             | 0.213 | 0.964   | 0.107 | 0.911   | 0.220 |
| C3      | 0.936      | 0.086 | 0.890   | 0.123 | 1.000    | 0.000 | 0.970     | 0.025 | 0.914                | 0.122 | 1.000       | 0.000 | 0.943             | 0.033 | 0.957   | 0.061 | 0.936   | 0.086 |
| C4      | 0.901      | 0.170 | 0.848   | 0.203 | 1.000    | 0.000 | 0.940     | 0.105 | 0.900                | 0.192 | 1.000       | 0.000 | 0.915             | 0.103 | 0.950   | 0.096 | 0.901   | 0.170 |
| C5      | 0.794      | 0.271 | 0.720   | 0.287 | 1.000    | 0.000 | 0.795     | 0.336 | 0.750                | 0.332 | 1.000       | 0.000 | 0.822             | 0.250 | 0.904   | 0.138 | 0.747   | 0.324 |
| C6      | 0.909      | 0.086 | 0.843   | 0.128 | 1.000    | 0.000 | 0.791     | 0.296 | 0.852                | 0.299 | 1.000       | 0.000 | 0.911             | 0.064 | 0.978   | 0.033 | 0.815   | 0.291 |
| C7      | 0.923      | 0.148 | 0.879   | 0.164 | 1.000    | 0.000 | 0.907     | 0.170 | 0.959                | 0.080 | 1.000       | 0.000 | 0.907             | 0.132 | 0.979   | 0.040 | 0.923   | 0.148 |
| T1      | 0.933      | 0.164 | 0.901   | 0.181 | 1.000    | 0.000 | 0.930     | 0.180 | 0.942                | 0.142 | 1.000       | 0.000 | 0.924             | 0.147 | 0.971   | 0.071 | 0.933   | 0.164 |
| T2      | 0.916      | 0.208 | 0.888   | 0.225 | 1.000    | 0.001 | 0.922     | 0.203 | 0.914                | 0.214 | 1.000       | 0.000 | 0.914             | 0.185 | 0.957   | 0.107 | 0.916   | 0.209 |
| T3      | 0.889      | 0.264 | 0.863   | 0.272 | 1.000    | 0.000 | 0.881     | 0.284 | 0.881                | 0.264 | 1.000       | 0.000 | 0.886             | 0.244 | 0.948   | 0.121 | 0.876   | 0.284 |
| T4      | 0.878      | 0.274 | 0.850   | 0.279 | 1.000    | 0.000 | 0.881     | 0.281 | 0.893                | 0.243 | 1.000       | 0.000 | 0.872             | 0.255 | 0.946   | 0.121 | 0.878   | 0.274 |
| T5      | 0.921      | 0.194 | 0.889   | 0.204 | 1.000    | 0.001 | 0.926     | 0.192 | 0.917                | 0.198 | 1.000       | 0.000 | 0.914             | 0.164 | 0.958   | 0.099 | 0.921   | 0.194 |
| T6      | 0.894      | 0.196 | 0.848   | 0.227 | 1.000    | 0.001 | 0.887     | 0.211 | 0.912                | 0.189 | 1.000       | 0.000 | 0.890             | 0.174 | 0.956   | 0.094 | 0.894   | 0.196 |
| T7      | 0.885      | 0.227 | 0.843   | 0.255 | 1.000    | 0.000 | 0.864     | 0.268 | 0.867                | 0.268 | 1.000       | 0.000 | 0.884             | 0.205 | 0.947   | 0.112 | 0.860   | 0.267 |
| T8      | 0.934      | 0.154 | 0.900   | 0.177 | 1.000    | 0.000 | 0.935     | 0.154 | 0.936                | 0.159 | 1.000       | 0.000 | 0.920             | 0.141 | 0.968   | 0.079 | 0.933   | 0.154 |
| T9      | 0.946      | 0.140 | 0.919   | 0.164 | 1.000    | 0.000 | 0.949     | 0.138 | 0.947                | 0.140 | 1.000       | 0.000 | 0.933             | 0.128 | 0.974   | 0.070 | 0.946   | 0.140 |
| T10     | 0.939      | 0.177 | 0.917   | 0.195 | 1.000    | 0.000 | 0.946     | 0.170 | 0.935                | 0.178 | 1.000       | 0.000 | 0.930             | 0.159 | 0.968   | 0.089 | 0.939   | 0.177 |
| T11     | 0.945      | 0.166 | 0.923   | 0.180 | 1.000    | 0.000 | 0.952     | 0.153 | 0.941                | 0.171 | 1.000       | 0.000 | 0.936             | 0.140 | 0.971   | 0.085 | 0.945   | 0.166 |
| T12     | 0.935      | 0.181 | 0.910   | 0.200 | 1.000    | 0.000 | 0.921     | 0.211 | 0.933                | 0.201 | 1.000       | 0.000 | 0.926             | 0.152 | 0.973   | 0.085 | 0.922   | 0.209 |
| L1      | 0.919      | 0.201 | 0.890   | 0.224 | 1.000    | 0.000 | 0.925     | 0.216 | 0.913                | 0.215 | 1.000       | 0.000 | 0.911             | 0.182 | 0.963   | 0.093 | 0.906   | 0.227 |
| L2      | 0.917      | 0.185 | 0.883   | 0.217 | 1.000    | 0.001 | 0.920     | 0.190 | 0.939                | 0.125 | 1.000       | 0.001 | 0.912             | 0.161 | 0.970   | 0.063 | 0.917   | 0.185 |
| L3      | 0.939      | 0.161 | 0.912   | 0.186 | 1.000    | 0.001 | 0.943     | 0.165 | 0.943                | 0.155 | 1.000       | 0.001 | 0.925             | 0.154 | 0.971   | 0.078 | 0.939   | 0.161 |
| L4      | 0.926      | 0.199 | 0.902   | 0.218 | 1.000    | 0.001 | 0.936     | 0.180 | 0.932                | 0.193 | 1.000       | 0.000 | 0.918             | 0.163 | 0.966   | 0.097 | 0.926   | 0.199 |
| L5      | 0.953      | 0.090 | 0.921   | 0.123 | 1.000    | 0.000 | 0.934     | 0.156 | 0.944                | 0.154 | 1.000       | 0.000 | 0.933             | 0.082 | 0.981   | 0.044 | 0.937   | 0.154 |
| Sacrum  | 0.968      | 0.035 | 0.940   | 0.054 | 1.000    | 0.000 | 0.961     | 0.055 | 0.977                | 0.011 | 1.000       | 0.000 | 0.931             | 0.043 | 0.989   | 0.006 | 0.968   | 0.035 |
| Average | 0.914      |       | 0.879   |       | 1.000    |       | 0.911     |       | 0.910                |       | 1.000       |       | 0.908             |       | 0.961   |       | 0.904   |       |
| SD      | 0.036      |       | 0.045   |       | 0.000    |       | 0.046     |       | 0.050                |       | 0.000       |       | 0.029             |       | 0.018   |       | 0.049   |       |

Figure 4

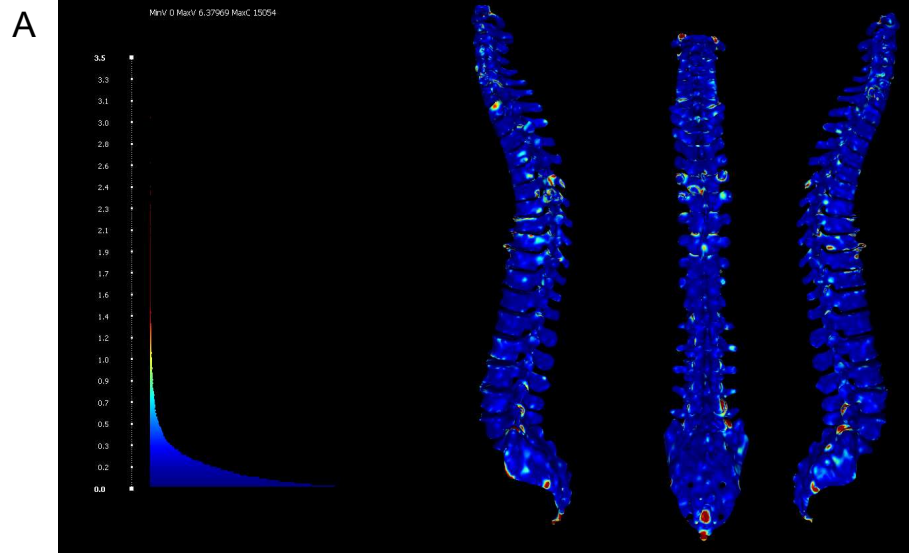

**B**

| Metric Class   | Hausdorff Distance (mm) |       | Lower 95% Confidence Interval | Upper 95% Confidence |
|----------------|-------------------------|-------|-------------------------------|----------------------|
|                | Average                 | SD    |                               |                      |
| C1             | 1.858                   | 0.438 | 1.675                         | 2.041                |
| C2             | 2.028                   | 0.428 | 1.845                         | 2.211                |
| C3             | 2.041                   | 0.465 | 1.832                         | 2.249                |
| C4             | 2.096                   | 0.655 | 1.809                         | 2.383                |
| C5             | 1.860                   | 0.678 | 1.626                         | 2.095                |
| C6             | 1.854                   | 0.508 | 1.716                         | 1.993                |
| C7             | 2.335                   | 0.585 | 2.193                         | 2.476                |
| T1             | 2.639                   | 0.585 | 2.498                         | 2.780                |
| T2             | 2.280                   | 0.592 | 2.137                         | 2.423                |
| T3             | 2.675                   | 0.766 | 2.491                         | 2.858                |
| T4             | 2.863                   | 0.796 | 2.670                         | 3.055                |
| T5             | 2.743                   | 0.843 | 2.533                         | 2.953                |
| T6             | 2.767                   | 0.881 | 2.552                         | 2.983                |
| T7             | 2.687                   | 0.865 | 2.484                         | 2.890                |
| T8             | 2.757                   | 0.877 | 2.555                         | 2.960                |
| T9             | 2.650                   | 0.791 | 2.471                         | 2.829                |
| T10            | 2.569                   | 0.734 | 2.403                         | 2.735                |
| T11            | 2.643                   | 0.775 | 2.471                         | 2.815                |
| T12            | 2.825                   | 0.716 | 2.664                         | 2.986                |
| L1             | 2.914                   | 0.793 | 2.730                         | 3.099                |
| L2             | 3.045                   | 0.870 | 2.832                         | 3.258                |
| L3             | 3.263                   | 0.789 | 3.060                         | 3.466                |
| L4             | 3.155                   | 0.600 | 3.002                         | 3.308                |
| L5             | 2.983                   | 0.548 | 2.841                         | 3.125                |
| Sacrum         | 3.566                   | 0.572 | 3.415                         | 3.717                |
| <b>Average</b> | 2.604                   |       |                               |                      |
| <b>SD</b>      | 0.450                   |       |                               |                      |

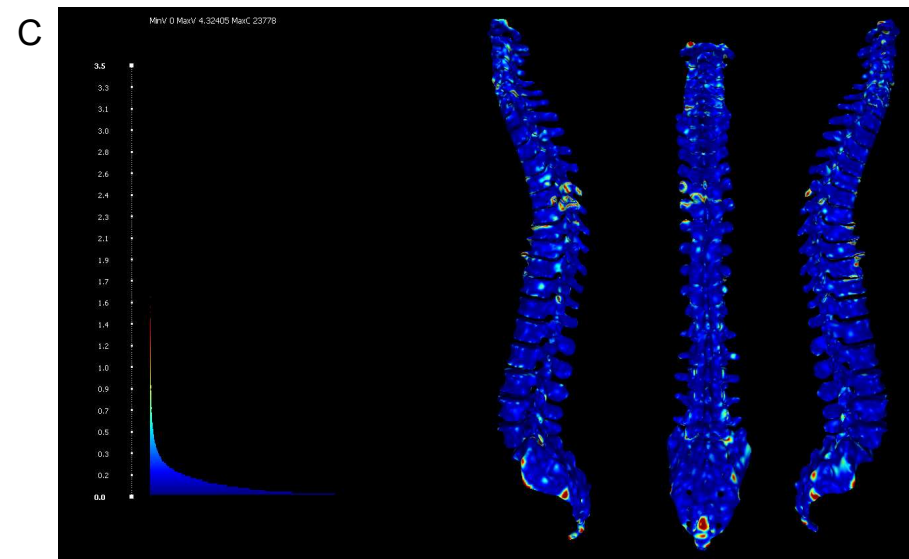

**D**

| Metric Class   | Hausdorff Distance (mm) |       | Lower 95% Confidence Interval | Upper 95% Confidence |
|----------------|-------------------------|-------|-------------------------------|----------------------|
|                | Average                 | SD    |                               |                      |
| C1             | 1.646                   | 0.402 | 1.478                         | 1.814                |
| C2             | 1.753                   | 0.474 | 1.550                         | 1.955                |
| C3             | 1.861                   | 0.485 | 1.643                         | 2.079                |
| C4             | 1.995                   | 0.702 | 1.687                         | 2.303                |
| C5             | 1.706                   | 0.738 | 1.450                         | 1.962                |
| C6             | 1.609                   | 0.472 | 1.481                         | 1.737                |
| C7             | 1.855                   | 0.508 | 1.733                         | 1.978                |
| T1             | 2.022                   | 0.691 | 1.856                         | 2.189                |
| T2             | 2.015                   | 0.634 | 1.862                         | 2.168                |
| T3             | 2.130                   | 0.652 | 1.974                         | 2.286                |
| T4             | 2.215                   | 0.726 | 2.040                         | 2.390                |
| T5             | 2.307                   | 0.858 | 2.097                         | 2.517                |
| T6             | 2.140                   | 0.871 | 1.936                         | 2.344                |
| T7             | 2.173                   | 0.927 | 1.959                         | 2.387                |
| T8             | 2.219                   | 0.837 | 2.029                         | 2.408                |
| T9             | 2.177                   | 0.684 | 2.022                         | 2.332                |
| T10            | 2.284                   | 0.755 | 2.117                         | 2.452                |
| T11            | 2.475                   | 0.811 | 2.293                         | 2.658                |
| T12            | 2.547                   | 0.945 | 2.327                         | 2.766                |
| L1             | 2.602                   | 1.014 | 2.354                         | 2.850                |
| L2             | 2.725                   | 0.832 | 2.511                         | 2.939                |
| L3             | 2.642                   | 0.800 | 2.438                         | 2.846                |
| L4             | 2.507                   | 0.666 | 2.334                         | 2.680                |
| L5             | 3.452                   | 0.571 | 3.301                         | 3.603                |
| Sacrum         | 2.287                   | 0.816 | 2.084                         | 2.490                |
| <b>Average</b> | 2.214                   |       |                               |                      |
| <b>SD</b>      | 0.398                   |       |                               |                      |







# Supplementary Figure 4

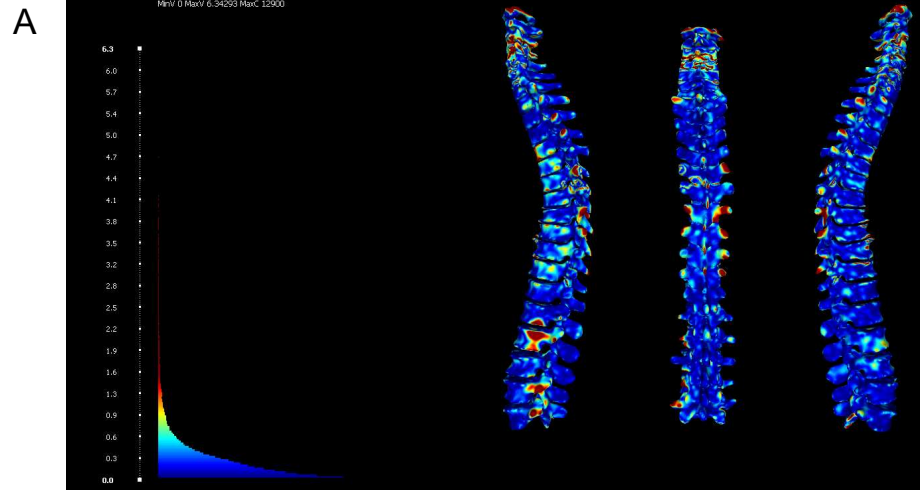

**B**

| Metric Class   | Hausdorff Distance (mm) |       | Lower 95% Confidence Interval | Upper 95% Confidence Interval |
|----------------|-------------------------|-------|-------------------------------|-------------------------------|
|                | Average                 | SD    |                               |                               |
| C1             | 2.820                   | 0.875 | 2.454                         | 3.185                         |
| C2             | 2.965                   | 0.647 | 2.688                         | 3.242                         |
| C3             | 2.782                   | 0.576 | 2.523                         | 3.041                         |
| C4             | 2.918                   | 0.713 | 2.606                         | 3.231                         |
| C5             | 2.370                   | 0.954 | 2.040                         | 2.701                         |
| C6             | 2.482                   | 0.652 | 2.305                         | 2.659                         |
| C7             | 3.100                   | 0.773 | 2.913                         | 3.286                         |
| T1             | 3.373                   | 0.879 | 3.161                         | 3.585                         |
| T2             | 2.785                   | 0.667 | 2.624                         | 2.946                         |
| T3             | 3.032                   | 0.844 | 2.830                         | 3.234                         |
| T4             | 3.107                   | 0.794 | 2.915                         | 3.298                         |
| T5             | 3.348                   | 0.757 | 3.160                         | 3.537                         |
| T6             | 3.532                   | 0.887 | 3.315                         | 3.749                         |
| T7             | 3.479                   | 0.946 | 3.258                         | 3.701                         |
| T8             | 3.508                   | 0.838 | 3.315                         | 3.702                         |
| T9             | 3.331                   | 0.907 | 3.126                         | 3.536                         |
| T10            | 3.156                   | 1.027 | 2.924                         | 3.388                         |
| T11            | 2.972                   | 0.919 | 2.768                         | 3.176                         |
| T12            | 3.077                   | 0.935 | 2.867                         | 3.287                         |
| L1             | 3.146                   | 0.936 | 2.928                         | 3.364                         |
| L2             | 3.340                   | 0.999 | 3.096                         | 3.585                         |
| L3             | 3.622                   | 1.092 | 3.341                         | 3.903                         |
| L4             | 3.479                   | 1.024 | 3.218                         | 3.740                         |
| L5             | 3.376                   | 0.921 | 3.137                         | 3.615                         |
| <b>Average</b> | 3.129                   |       |                               |                               |
| <b>SD</b>      | 0.322                   |       |                               |                               |

# Supplementary Figure 5

A

| Metric | p-value spineCT-ResNetSeg vs spineCT_nnUNet |         |          |           |             |             |                   |         |         |                    |
|--------|---------------------------------------------|---------|----------|-----------|-------------|-------------|-------------------|---------|---------|--------------------|
| Class  | Dice Score                                  | IoU     | Accuracy | Precision | Sensitivity | Specificity | Boundary F1 Score | AUC     | Kappa   | Hausdorff Distance |
| C1     | 0.70459                                     | 0.62022 | 0.37299  | 0.60639   | 0.77369     | 0.23583     | 0.63048           | 0.88678 | 0.99676 | 0.10134            |
| C2     | 0.76732                                     | 0.62264 | 0.04599  | 0.74846   | 0.84630     | 0.07175     | 0.67279           | 0.84609 | 0.76712 | 0.05541            |
| C3     | 0.38920                                     | 0.37530 | 0.81518  | 0.19540   | 0.52399     | 0.08493     | 0.13669           | 0.52379 | 0.38927 | 0.25019            |
| C4     | 0.91825                                     | 0.69662 | 0.70715  | 0.26210   | 0.82387     | 0.11154     | 0.45383           | 0.82425 | 0.91819 | 0.64195            |
| C5     | 0.08377                                     | 0.12542 | 0.98932  | 0.18394   | 0.29629     | 0.24132     | 0.04939           | 0.07429 | 0.27292 | 0.38644            |
| C6     | 0.00029                                     | 0.00013 | 0.55940  | 0.62289   | 0.03974     | 0.28055     | 0.00009           | 0.00002 | 0.11968 | 0.01228            |
| C7     | 0.00100                                     | 0.00002 | 0.01311  | 0.32447   | 0.00000     | 0.70594     | 0.00004           | 0.00000 | 0.00099 | 0.00000            |
| T1     | 0.07743                                     | 0.00520 | 0.29485  | 0.00300   | 0.90277     | 0.20333     | 0.00176           | 0.90530 | 0.07739 | 0.00000            |
| T2     | 0.50221                                     | 0.28602 | 0.77267  | 0.63746   | 0.38511     | 0.82585     | 0.32729           | 0.38542 | 0.50240 | 0.01414            |
| T3     | 0.09918                                     | 0.01880 | 0.43897  | 0.38910   | 0.05015     | 0.69282     | 0.08713           | 0.03676 | 0.12344 | 0.00002            |
| T4     | 0.12399                                     | 0.02828 | 0.20584  | 0.03377   | 0.34078     | 0.21254     | 0.05540           | 0.34000 | 0.12387 | 0.00000            |
| T5     | 0.03212                                     | 0.00940 | 0.33326  | 0.33251   | 0.03608     | 0.29437     | 0.01227           | 0.03611 | 0.03218 | 0.00273            |
| T6     | 0.01649                                     | 0.01140 | 0.37949  | 0.02841   | 0.00710     | 0.48161     | 0.00721           | 0.00712 | 0.01653 | 0.00330            |
| T7     | 0.09539                                     | 0.03637 | 0.30951  | 0.16098   | 0.25788     | 0.11183     | 0.03190           | 0.19187 | 0.14948 | 0.00028            |
| T8     | 0.06248                                     | 0.01513 | 0.12454  | 0.01994   | 0.12454     | 0.08958     | 0.00857           | 0.23178 | 0.03474 | 0.00016            |
| T9     | 0.02940                                     | 0.00959 | 0.13170  | 0.03971   | 0.02133     | 0.15602     | 0.00441           | 0.02125 | 0.02933 | 0.00145            |
| T10    | 0.16943                                     | 0.07827 | 0.17091  | 0.27567   | 0.11463     | 0.24472     | 0.06896           | 0.11449 | 0.16902 | 0.00091            |
| T11    | 0.30885                                     | 0.12574 | 0.33137  | 0.14648   | 0.50813     | 0.30453     | 0.07663           | 0.50723 | 0.30843 | 0.00396            |
| T12    | 0.49914                                     | 0.23033 | 0.52564  | 0.69929   | 0.46163     | 0.98056     | 0.09686           | 0.38318 | 0.56405 | 0.00652            |
| L1     | 0.57987                                     | 0.36998 | 0.78695  | 0.82605   | 0.83668     | 0.95113     | 0.19787           | 0.49408 | 0.86899 | 0.01320            |
| L2     | 0.18699                                     | 0.10461 | 0.68086  | 0.98805   | 0.00890     | 0.76718     | 0.04443           | 0.00897 | 0.18701 | 0.00902            |
| L3     | 0.24919                                     | 0.10319 | 0.47364  | 0.32719   | 0.27620     | 0.44883     | 0.05272           | 0.27548 | 0.24888 | 0.00051            |
| L4     | 0.25326                                     | 0.09455 | 0.45636  | 0.43427   | 0.20754     | 0.33812     | 0.02724           | 0.20696 | 0.25294 | 0.00015            |
| L5     | 0.06874                                     | 0.02030 | 0.44177  | 0.25953   | 0.76385     | 0.17086     | 0.00164           | 0.24012 | 0.39430 | 0.00006            |
| Sacrum | 0.06283                                     | 0.03119 | 0.15076  | 0.69608   | 0.00000     | 0.64117     | 0.00198           | 0.00000 | 0.06199 | 0.29829            |

B

| Metric | p-value spineCT-ResNetSeg vs MONAI-Verse |         |          |           |             |             |                   |         |         |                    |
|--------|------------------------------------------|---------|----------|-----------|-------------|-------------|-------------------|---------|---------|--------------------|
| Class  | Dice Score                               | IoU     | Accuracy | Precision | Sensitivity | Specificity | Boundary F1 Score | AUC     | Kappa   | Hausdorff Distance |
| C1     | 0.00009                                  | 0.00000 | 0.00999  | 0.26757   | 0.00000     | 0.04576     | 0.00014           | 0.00000 | 0.00009 | 0.00007            |
| C2     | 0.01107                                  | 0.00219 | 0.00194  | 0.03920   | 0.00309     | 0.03918     | 0.00393           | 0.00394 | 0.01103 | 0.00000            |
| C3     | 0.00162                                  | 0.00011 | 0.00301  | 0.21819   | 0.00011     | 0.77313     | 0.00054           | 0.00008 | 0.00162 | 0.00011            |
| C4     | 0.00031                                  | 0.00005 | 0.00841  | 0.03238   | 0.00001     | 0.29519     | 0.00022           | 0.00001 | 0.00031 | 0.00051            |
| C5     | 0.03262                                  | 0.01585 | 0.04449  | 0.02216   | 0.03347     | 0.01699     | 0.02030           | 0.03712 | 0.03256 | 0.01675            |
| C6     | 0.00000                                  | 0.00000 | 0.01378  | 0.00000   | 0.00000     | 0.28034     | 0.00000           | 0.00000 | 0.00000 | 0.00000            |
| C7     | 0.00000                                  | 0.00000 | 0.00285  | 0.00000   | 0.00000     | 0.64321     | 0.00000           | 0.00000 | 0.00000 | 0.00000            |
| T1     | 0.00000                                  | 0.00000 | 0.04222  | 0.75315   | 0.00000     | 0.04798     | 0.00000           | 0.00000 | 0.00000 | 0.00000            |
| T2     | 0.03197                                  | 0.00472 | 0.49916  | 0.04358   | 0.03495     | 0.60738     | 0.00550           | 0.06750 | 0.03181 | 0.00001            |
| T3     | 0.04069                                  | 0.03442 | 0.10117  | 0.01611   | 0.26632     | 0.06077     | 0.01945           | 0.15439 | 0.08519 | 0.01131            |
| T4     | 0.00098                                  | 0.00093 | 0.17255  | 0.10940   | 0.00001     | 0.41258     | 0.00100           | 0.00000 | 0.00098 | 0.08011            |
| T5     | 0.00004                                  | 0.00001 | 0.33749  | 0.00890   | 0.00000     | 0.70684     | 0.00001           | 0.00000 | 0.00004 | 0.00005            |
| T6     | 0.00000                                  | 0.00000 | 0.16731  | 0.00313   | 0.00000     | 0.68572     | 0.00000           | 0.00000 | 0.00000 | 0.00000            |
| T7     | 0.00000                                  | 0.00000 | 0.16460  | 0.00021   | 0.00000     | 0.97582     | 0.00000           | 0.00000 | 0.00000 | 0.00000            |
| T8     | 0.00000                                  | 0.00000 | 0.11214  | 0.00102   | 0.00000     | 0.96214     | 0.00000           | 0.00000 | 0.00000 | 0.00000            |
| T9     | 0.00000                                  | 0.00000 | 0.25478  | 0.02706   | 0.00000     | 0.87060     | 0.00000           | 0.00000 | 0.00000 | 0.00000            |
| T10    | 0.00080                                  | 0.00026 | 0.35119  | 0.00841   | 0.00013     | 0.78478     | 0.00011           | 0.00014 | 0.00081 | 0.00009            |
| T11    | 0.00752                                  | 0.00576 | 0.36233  | 0.14362   | 0.00040     | 0.65906     | 0.00195           | 0.00094 | 0.00414 | 0.01684            |
| T12    | 0.00295                                  | 0.00248 | 0.14787  | 0.62042   | 0.00101     | 0.94077     | 0.00269           | 0.00051 | 0.00541 | 0.06433            |
| L1     | 0.00221                                  | 0.00150 | 0.22585  | 0.07469   | 0.00034     | 0.44340     | 0.00194           | 0.00035 | 0.00220 | 0.11389            |
| L2     | 0.00509                                  | 0.00474 | 0.46612  | 0.02918   | 0.00089     | 0.52267     | 0.00107           | 0.00095 | 0.00511 | 0.07658            |
| L3     | 0.00171                                  | 0.00157 | 0.57122  | 0.04284   | 0.00006     | 0.74193     | 0.00083           | 0.00033 | 0.00051 | 0.04490            |
| L4     | 0.00731                                  | 0.00483 | 0.35114  | 0.01723   | 0.00127     | 0.41694     | 0.00448           | 0.00130 | 0.00731 | 0.03846            |
| L5     | 0.00012                                  | 0.00004 | 0.11469  | 0.01287   | 0.00000     | 0.27333     | 0.00011           | 0.00000 | 0.00006 | 0.00686            |
